# Supplementary figures and images for: Revisiting the role of the immunoproteasome in the activation of the canonical NF-κB pathway
Source: Royal Society of Chemistry journal article supplement (doi:10.1039/c2mb25125f), 2012-05-25

|                                      |   |   |   |   |                              |   |
|--------------------------------------|---|---|---|---|------------------------------|---|
| <b>UK-101 (1 <math>\mu</math>M)</b>  | - | + | - | + | <b>Epx</b>                   | - |
| <b>LKS01 (0.2 <math>\mu</math>M)</b> | - | - | + | + | <b>(1 <math>\mu</math>M)</b> | - |

$\beta$ 1i

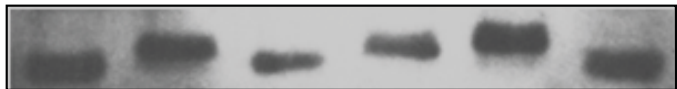

$\beta$ 5i

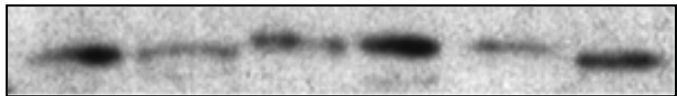

$\beta$ 1

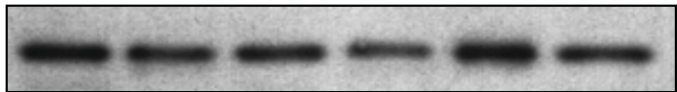

$\beta$ 5

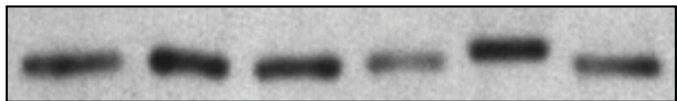

**Panc-1**

Supplement: c2mb25125f.pdf [file c2mb25125f.pdf]

## Panc-1

**A**

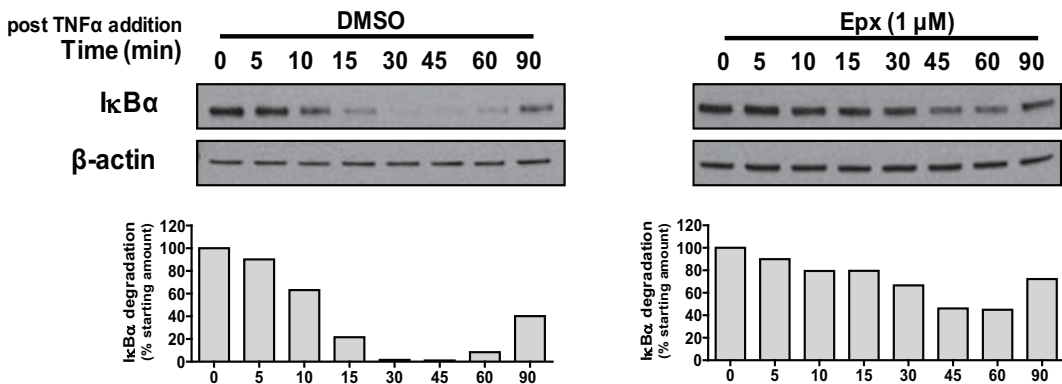

**B**

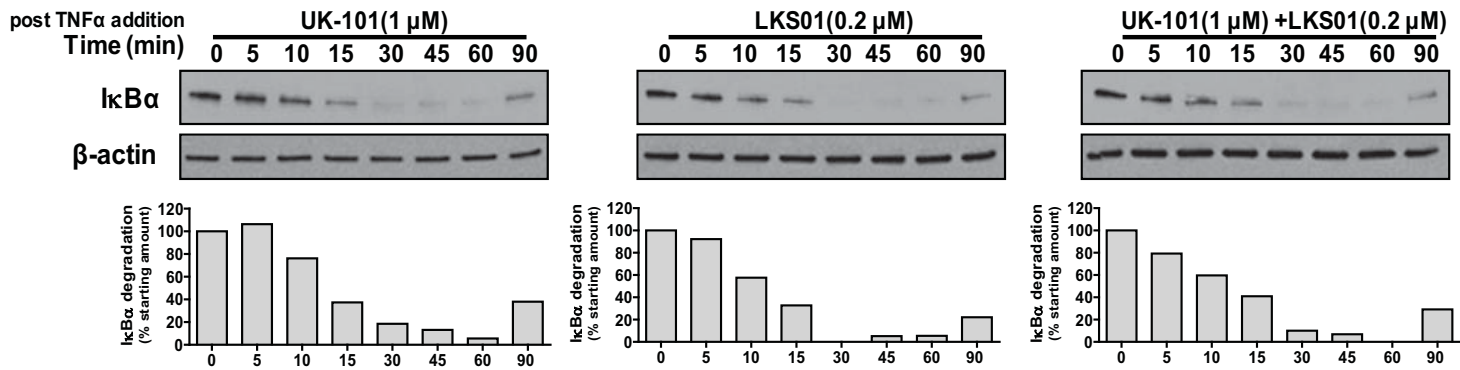

Supplement: c2mb25125f_2.pdf [file c2mb25125f_2.pdf]

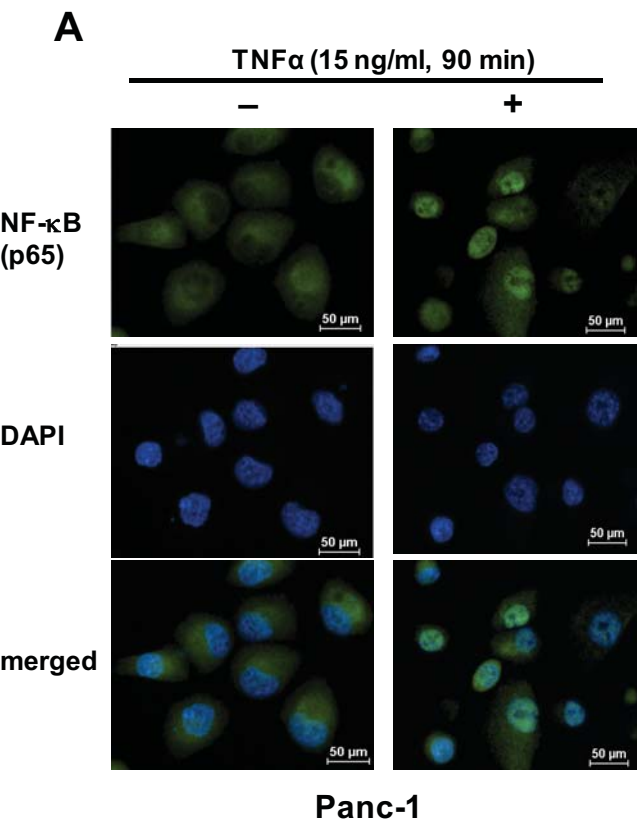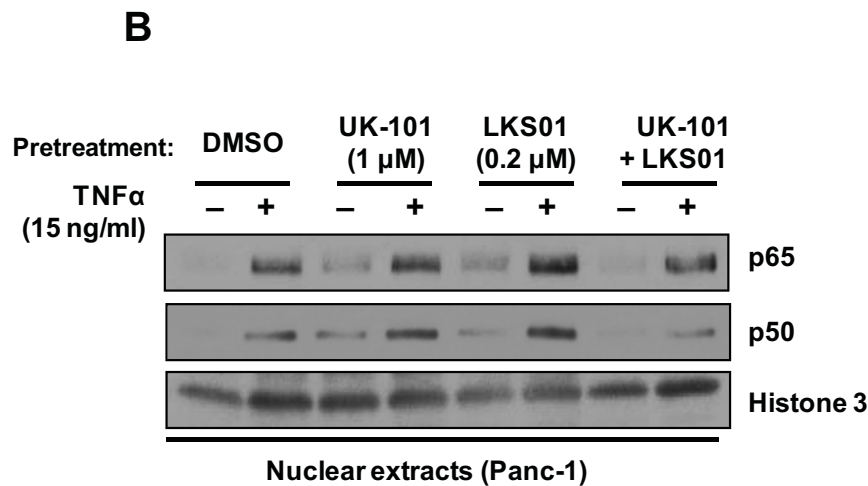

Supplement: c2mb25125f_3.pdf [file c2mb25125f_3.pdf]
